# Supplementary material for: Identifying Neighborhoods of Coordinated Gene Expression and Metabolite Profiles
Source: PubMed Central journal article supplement (PMC3280297; doi:10.1371/journal.pone.0031345), 2012-02-15

# coldstress Time Lagged Network Neighborhood Correlations

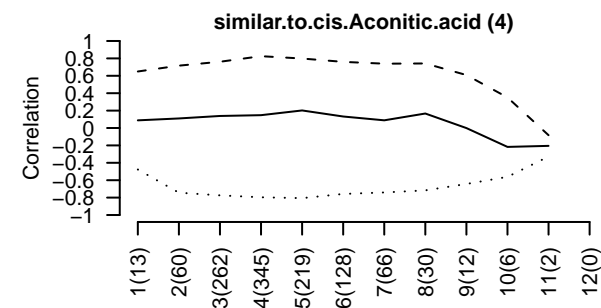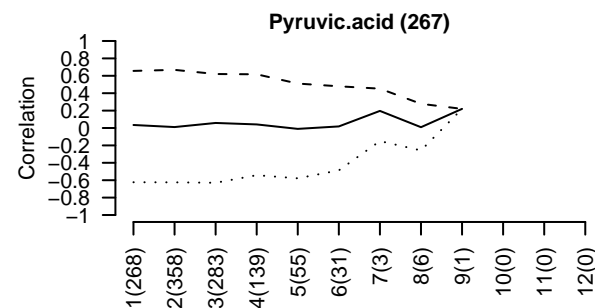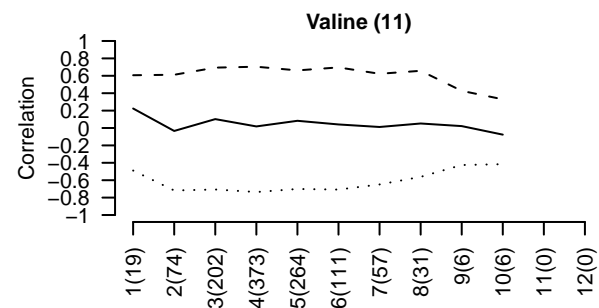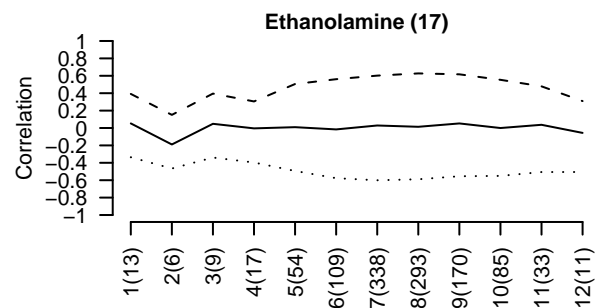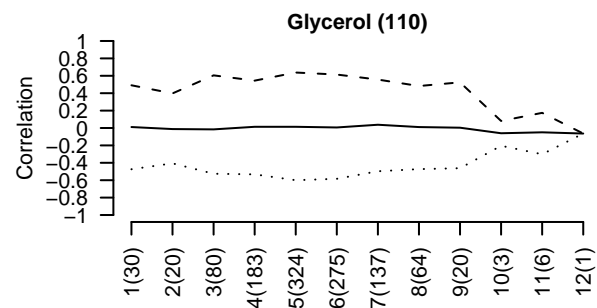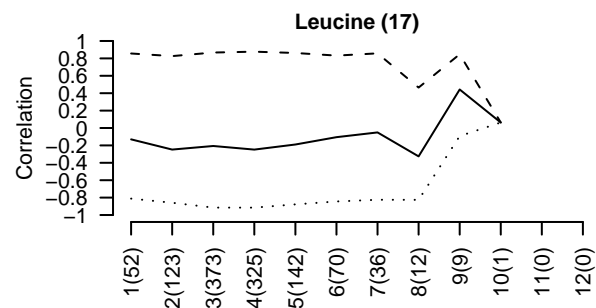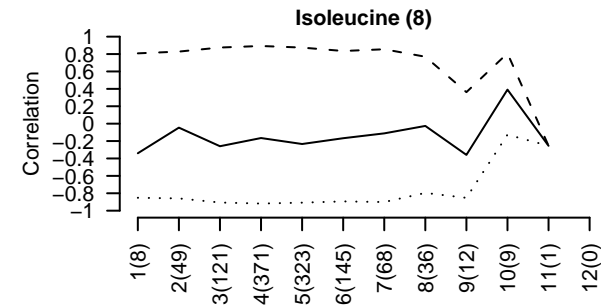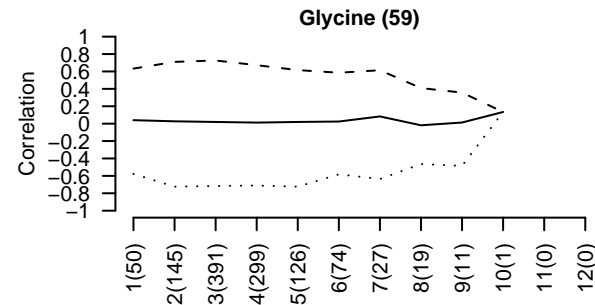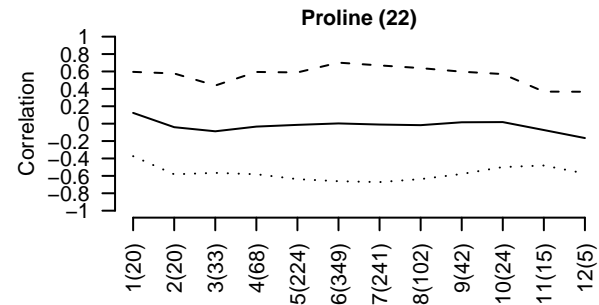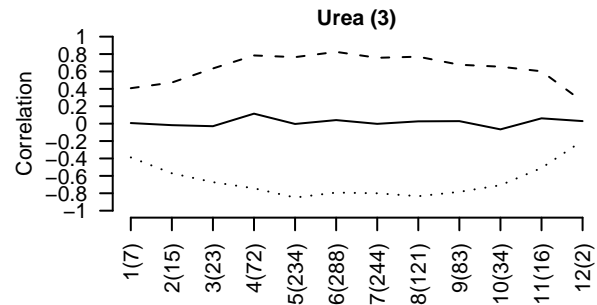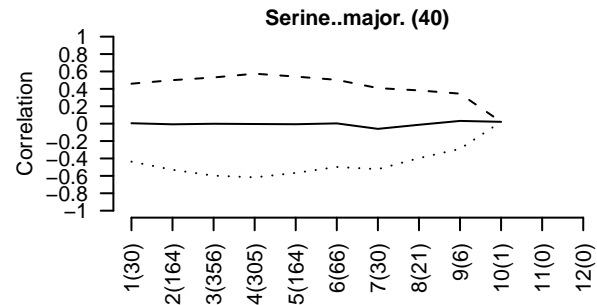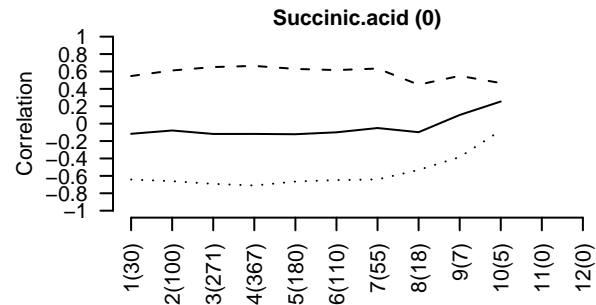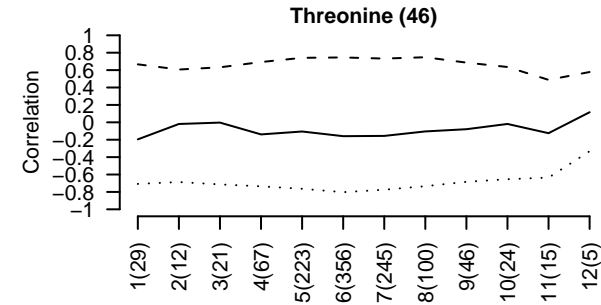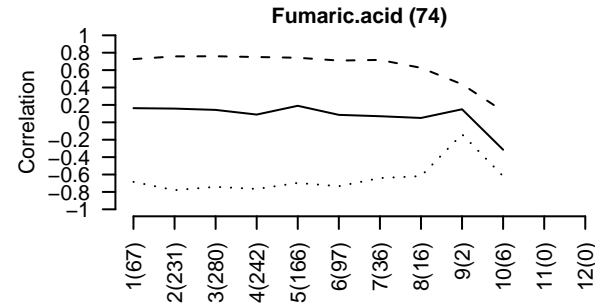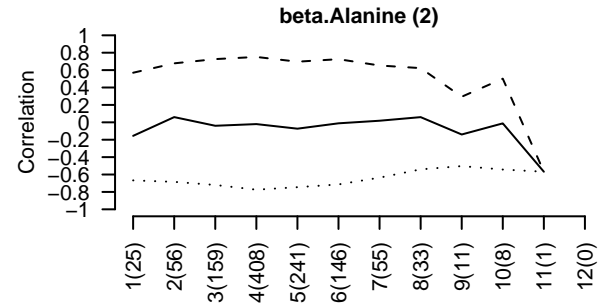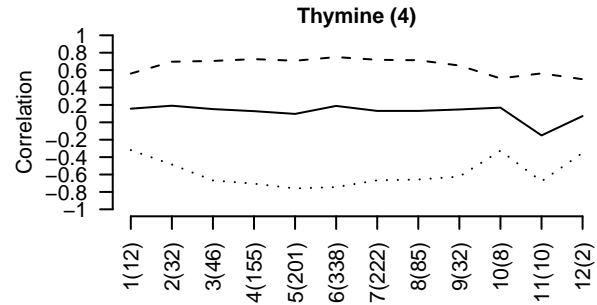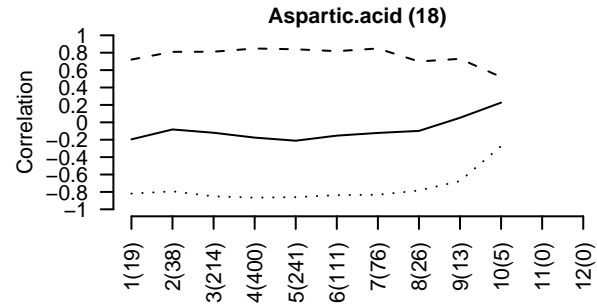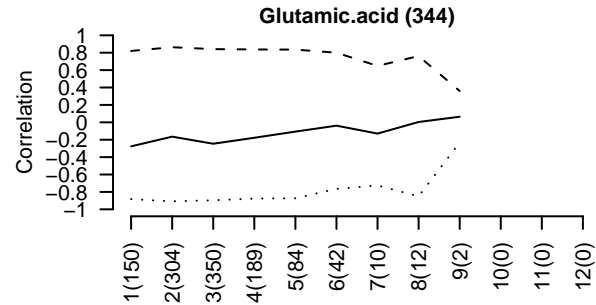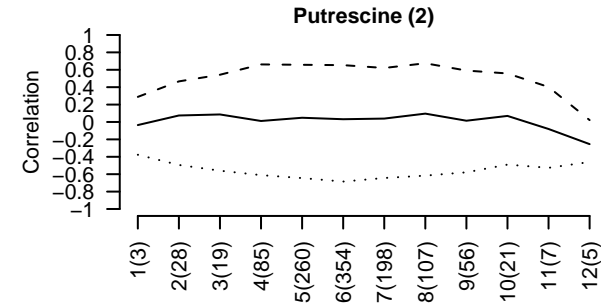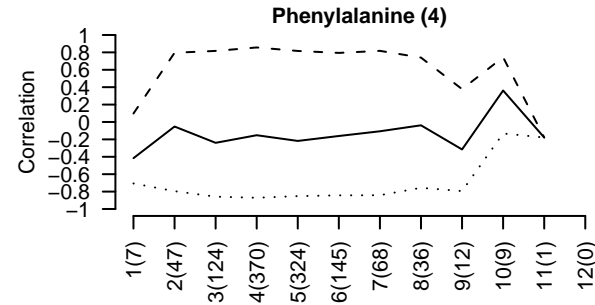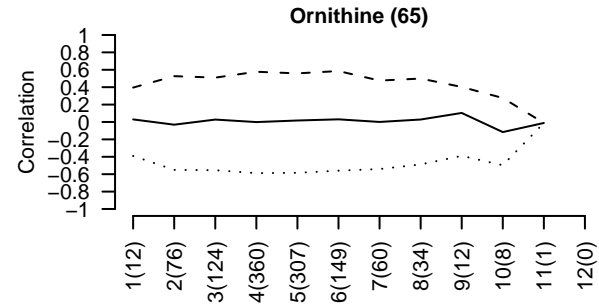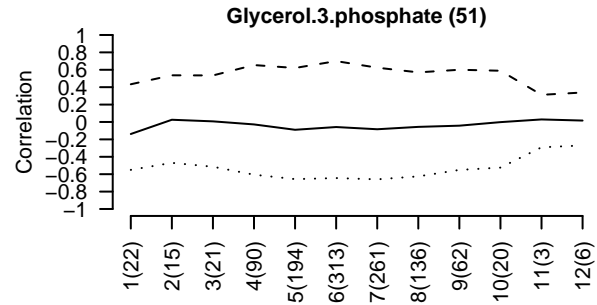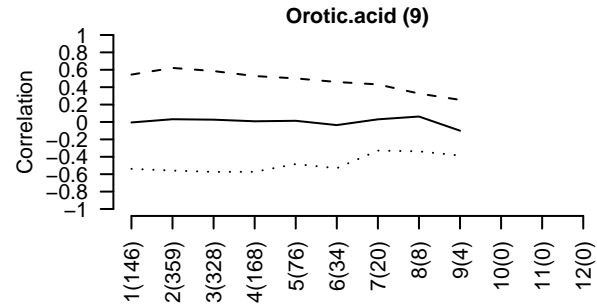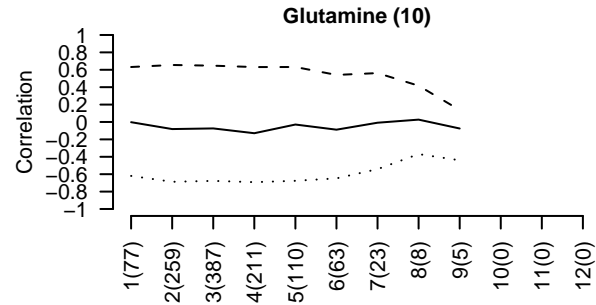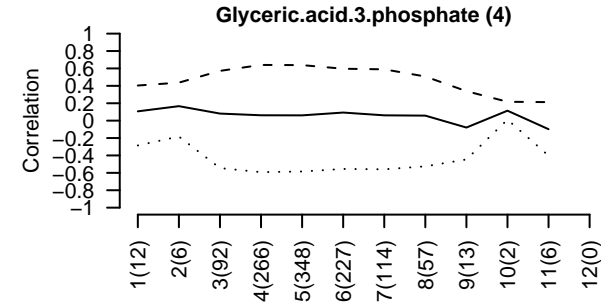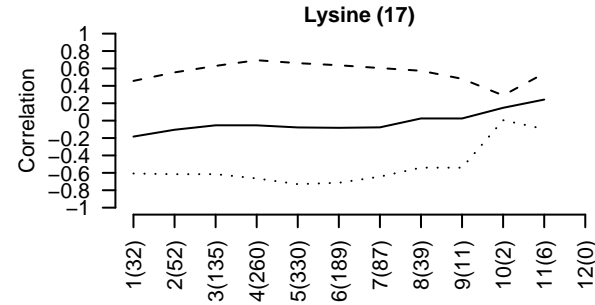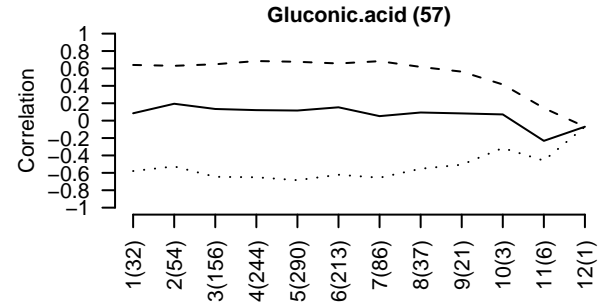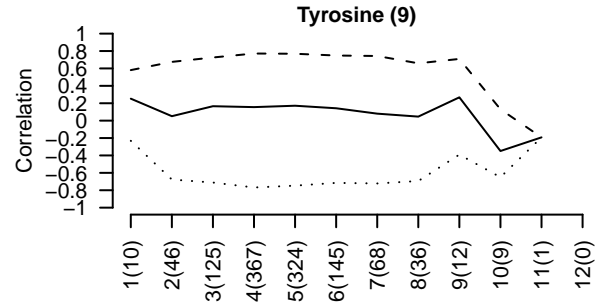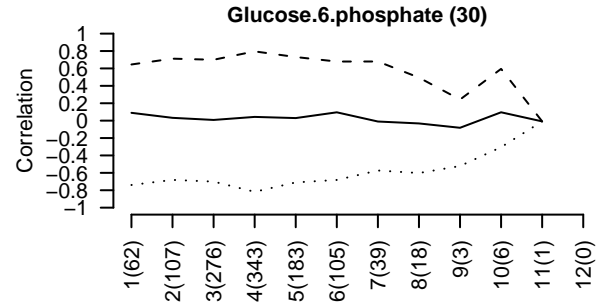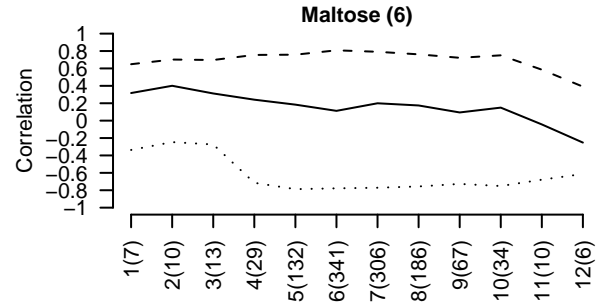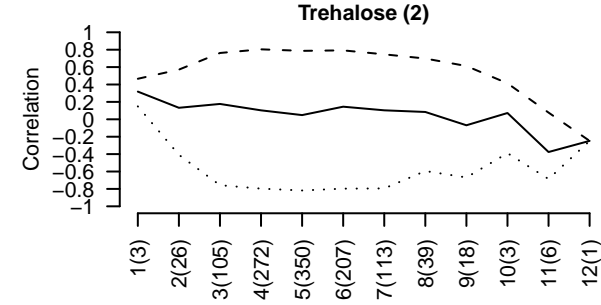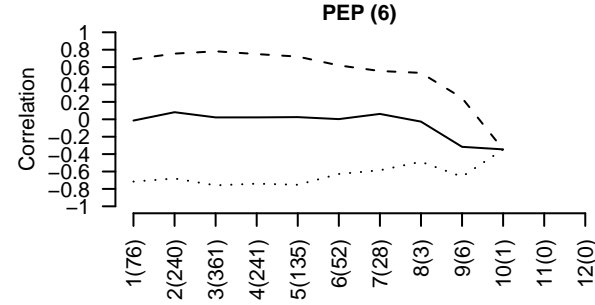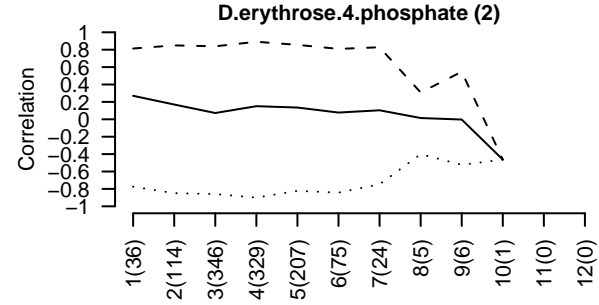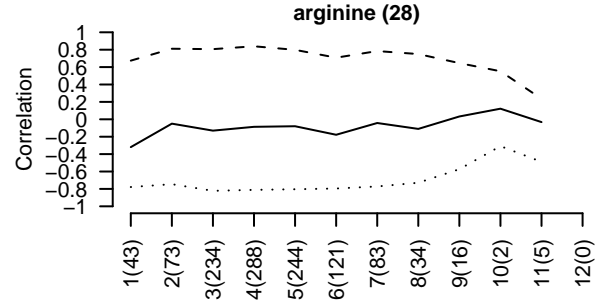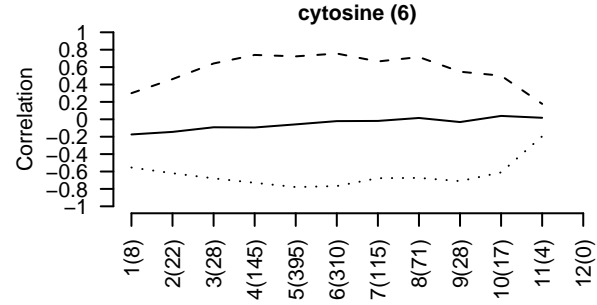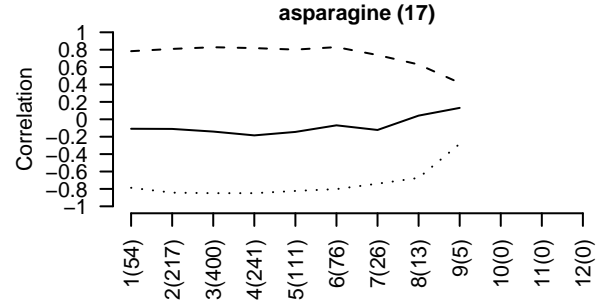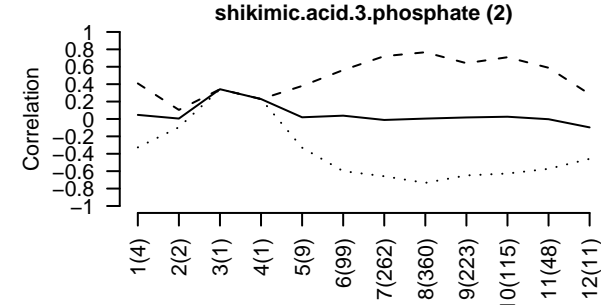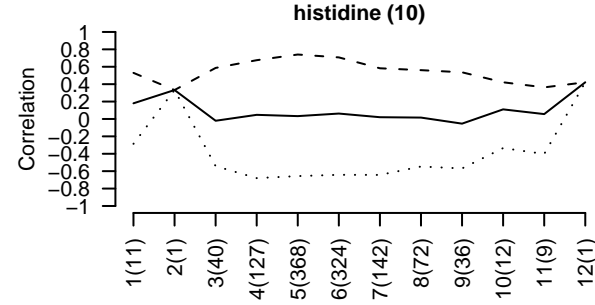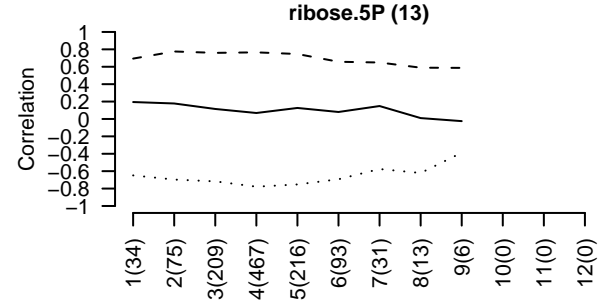

control Time Lagged Network Neighborhood Correlations

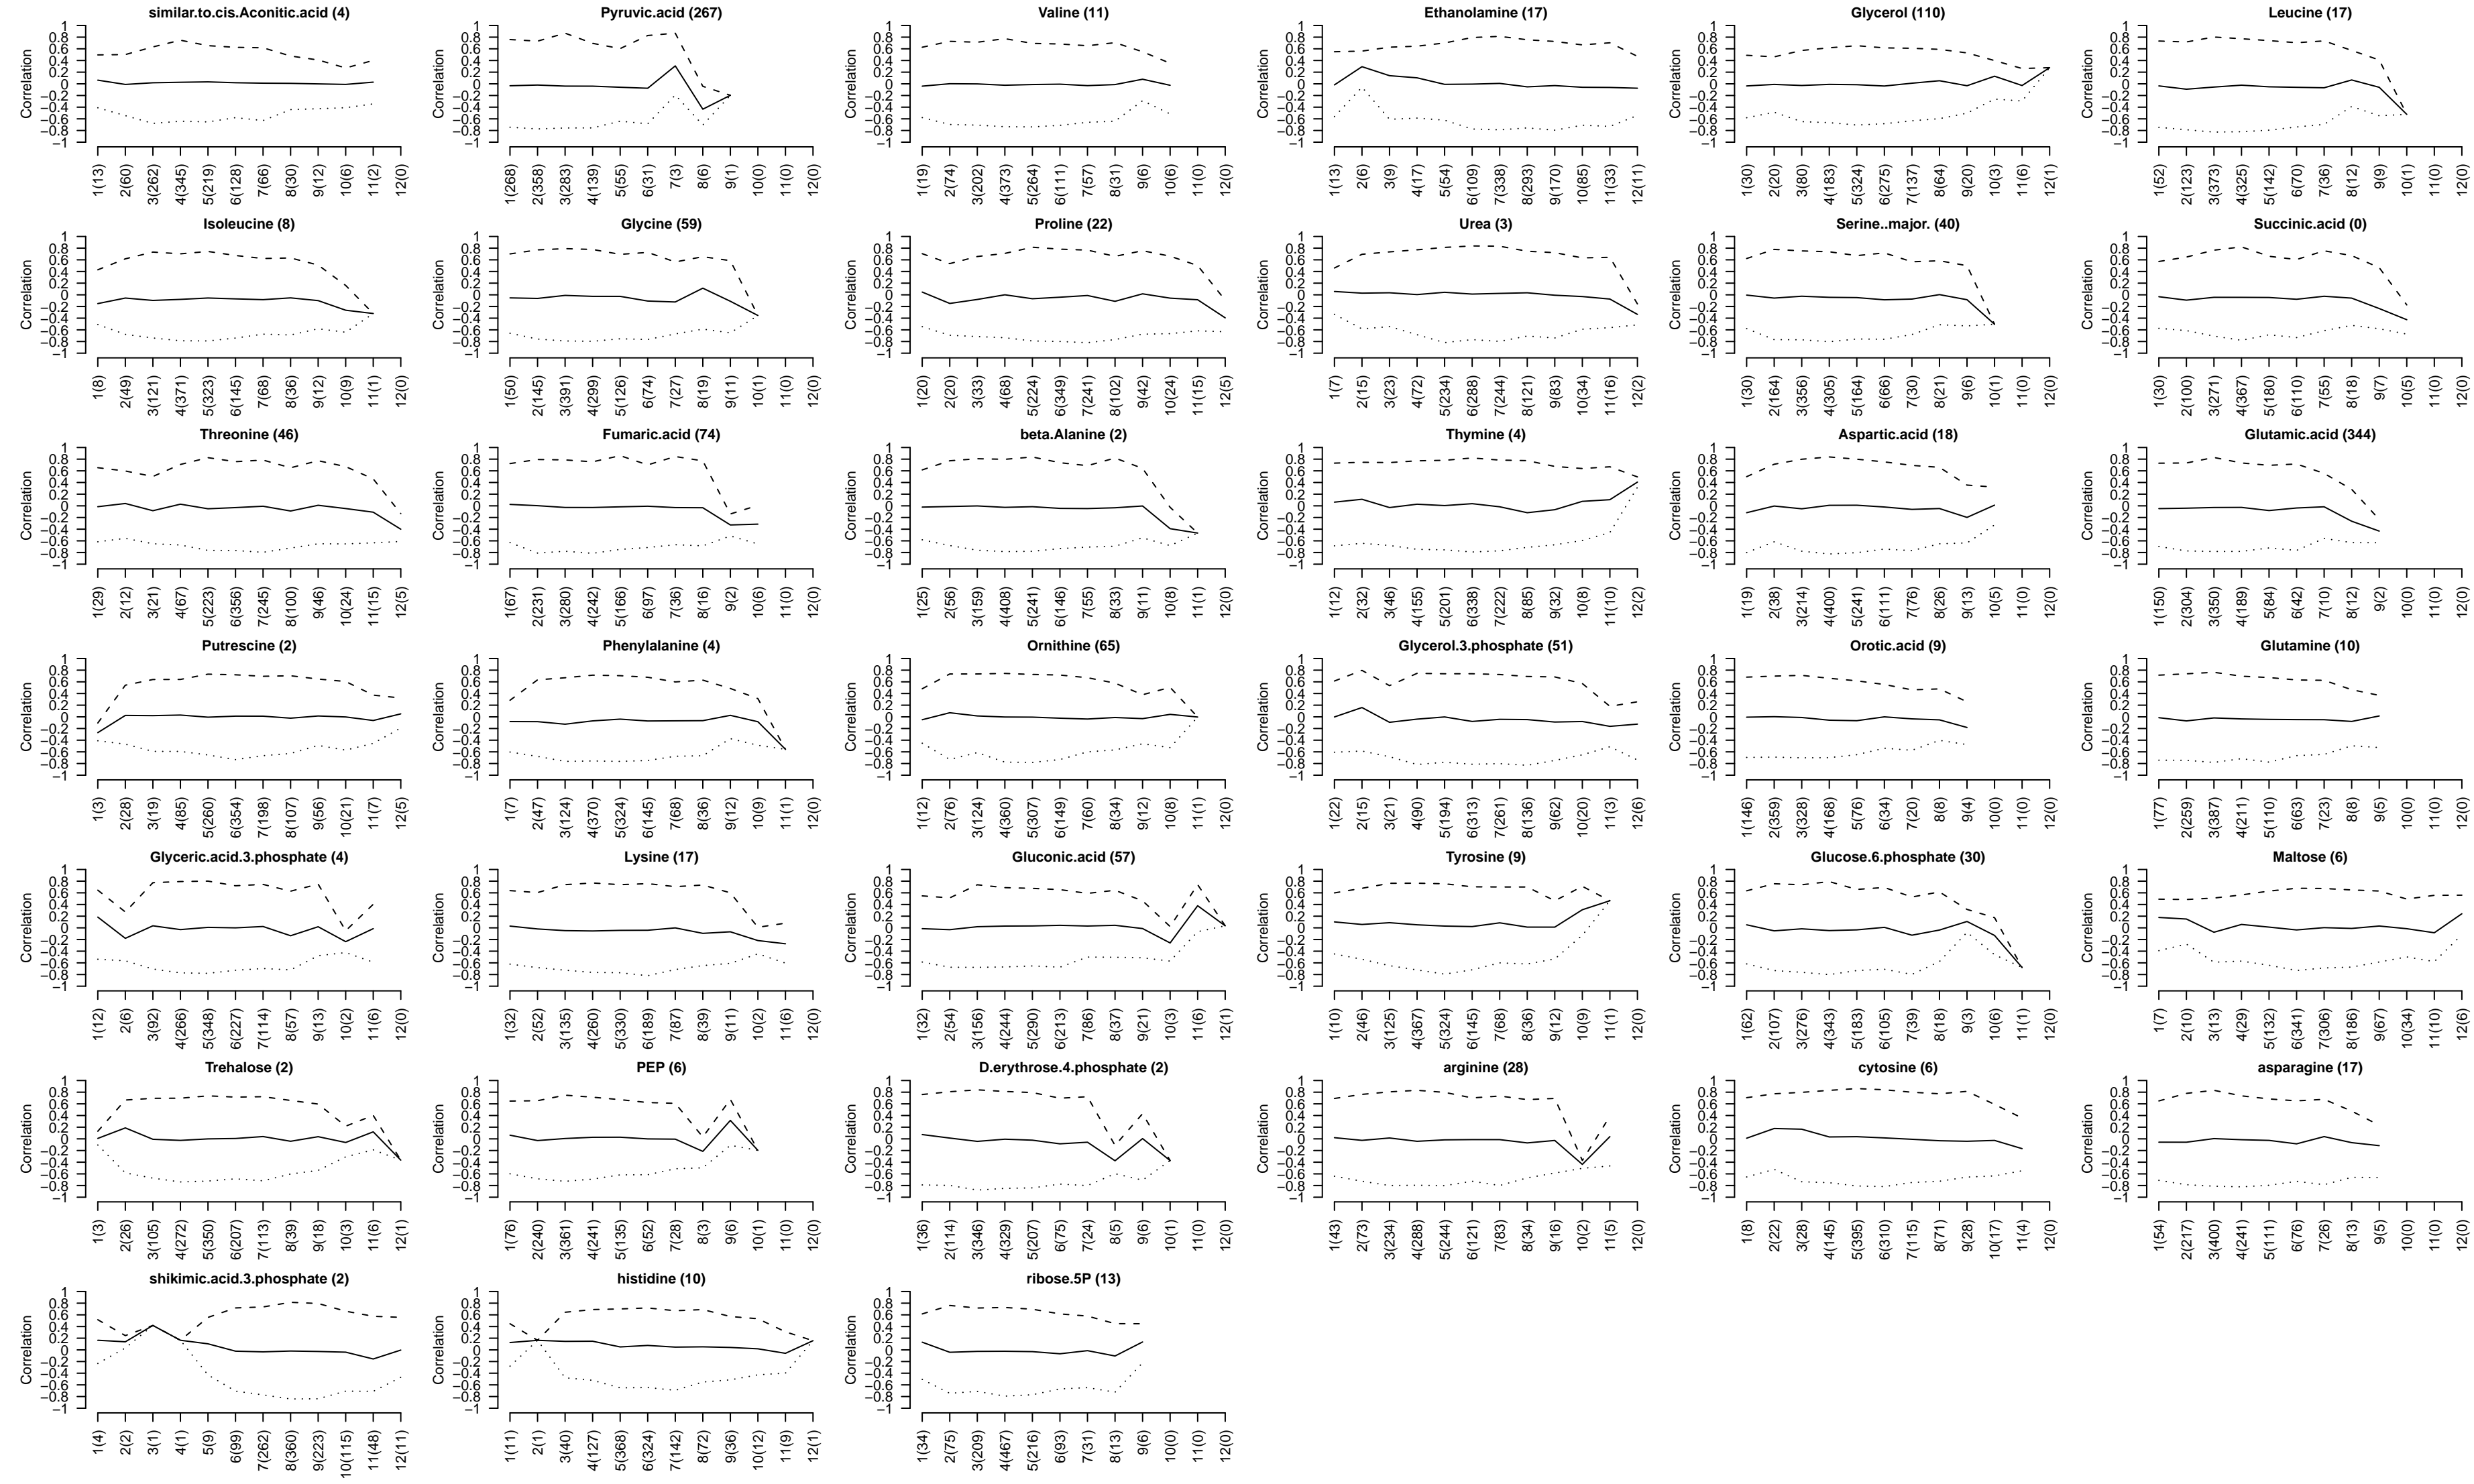

# heatstress Time Lagged Network Neighborhood Correlations

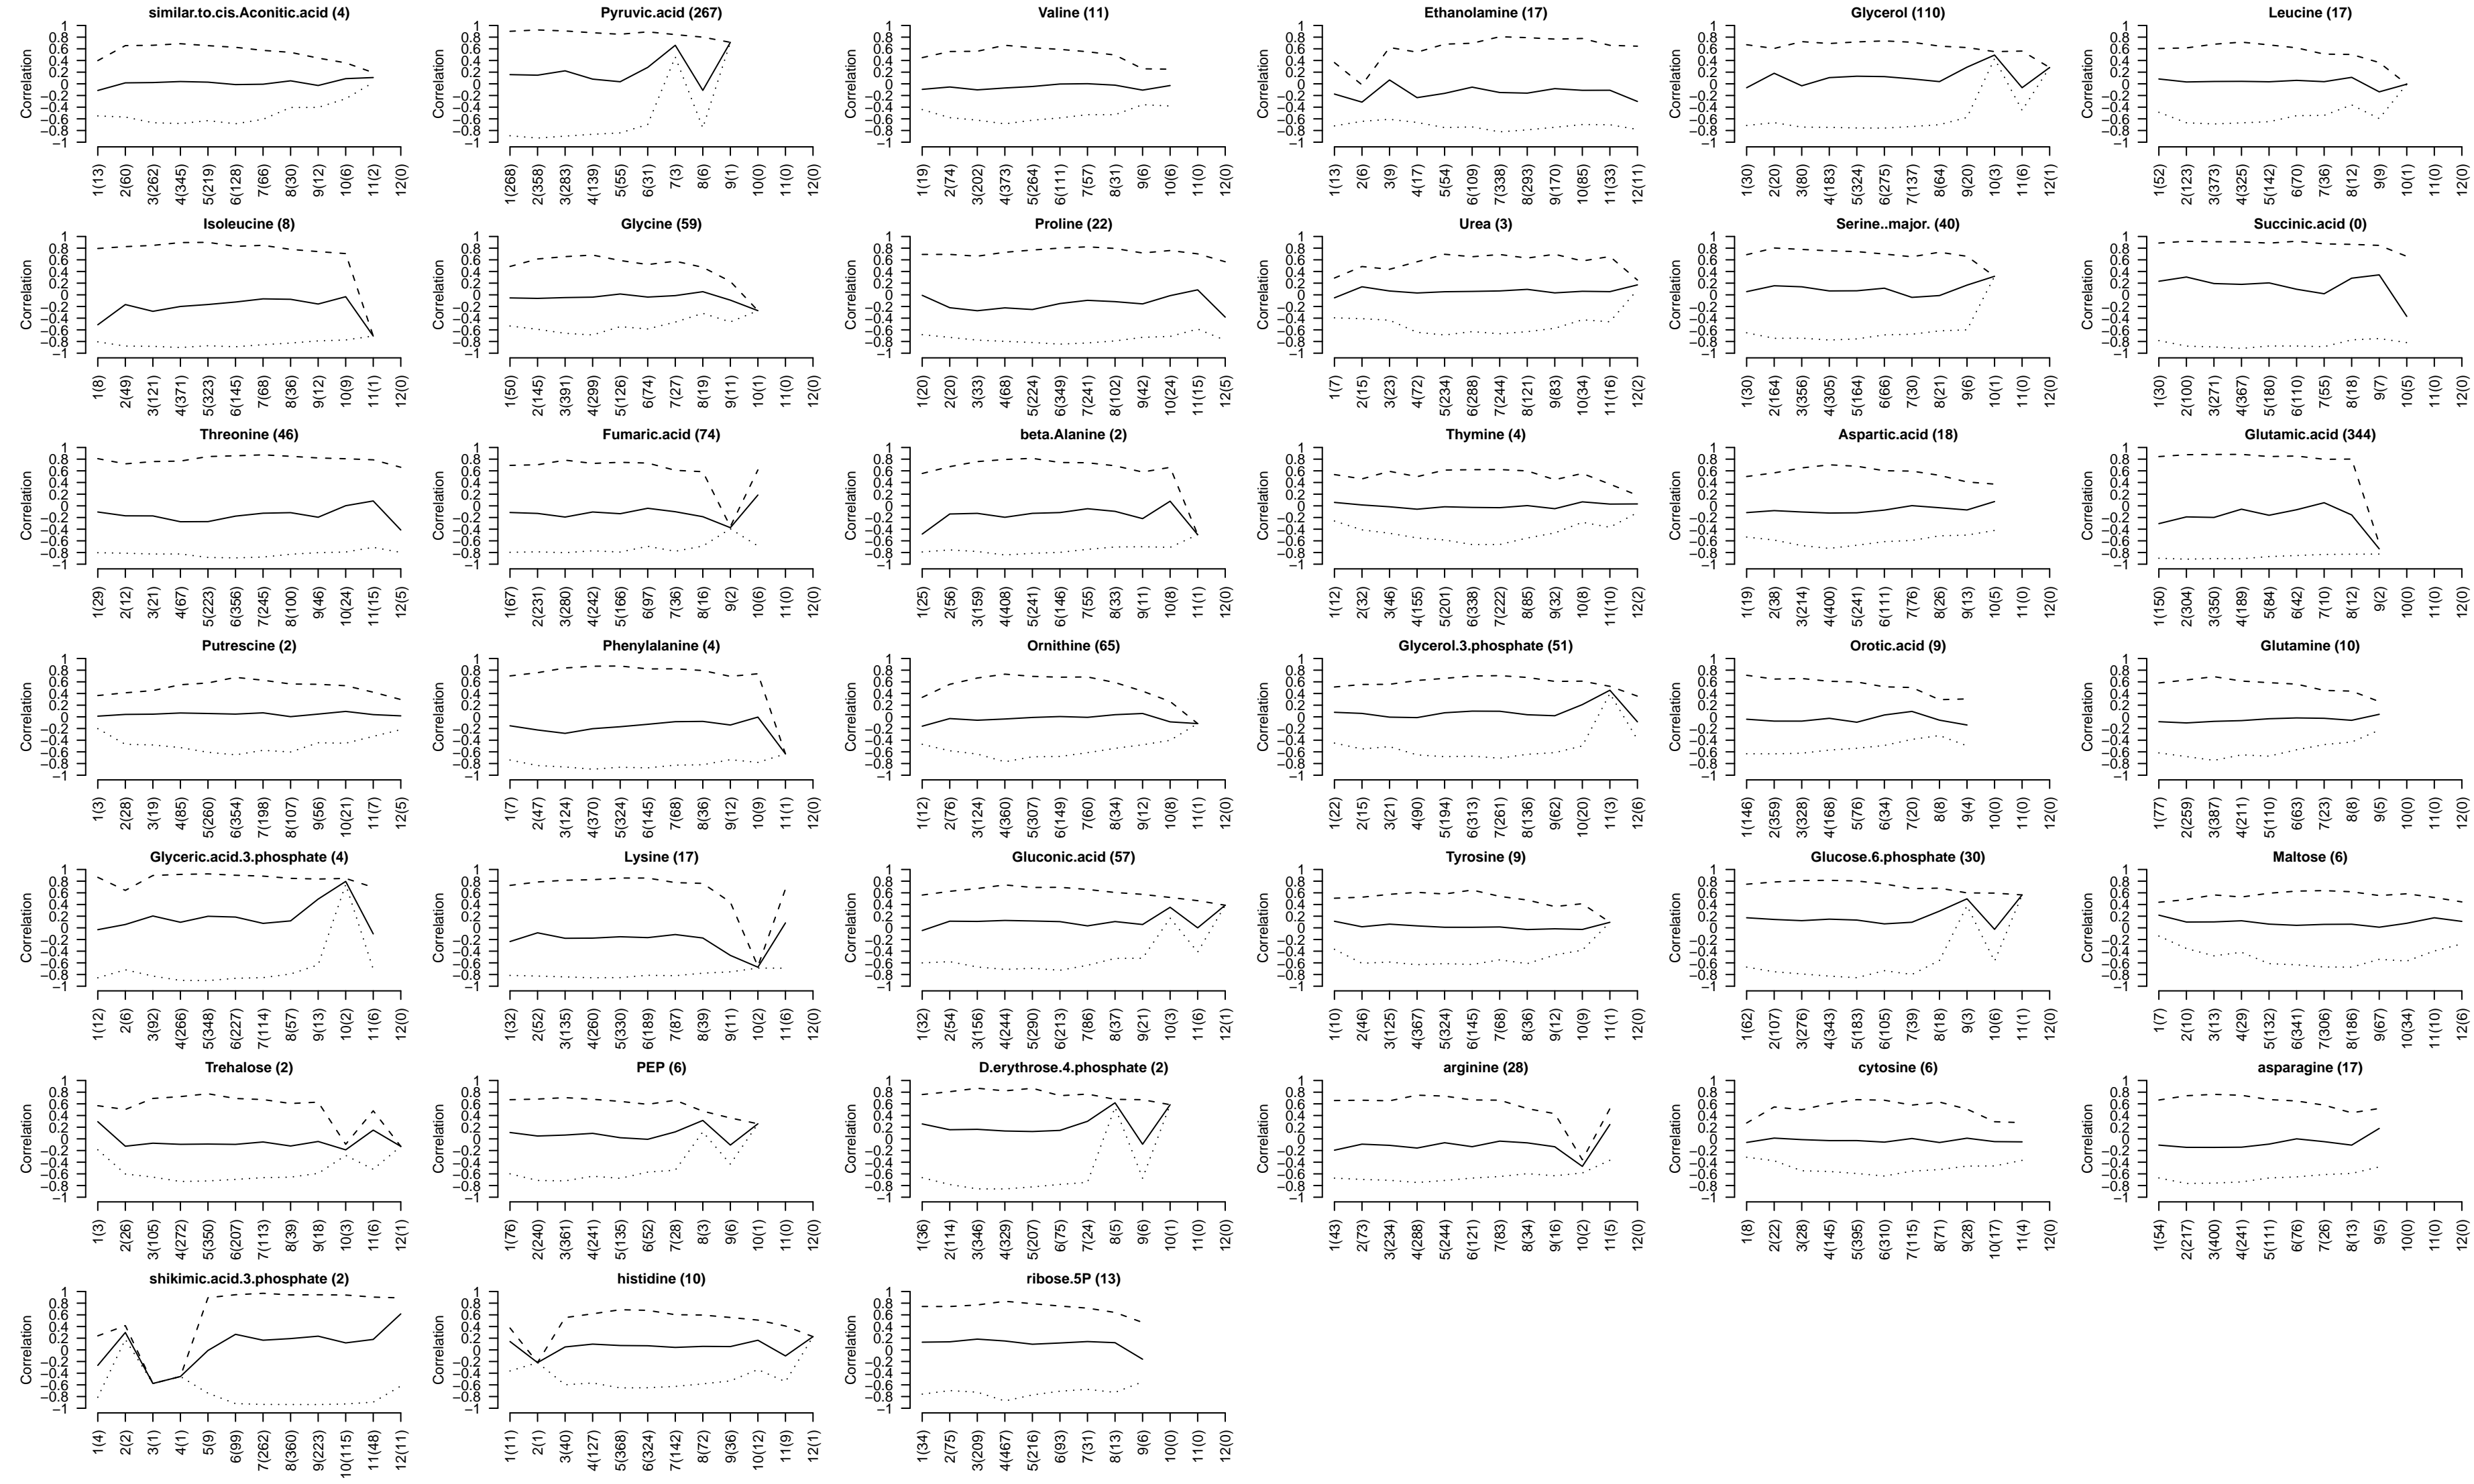

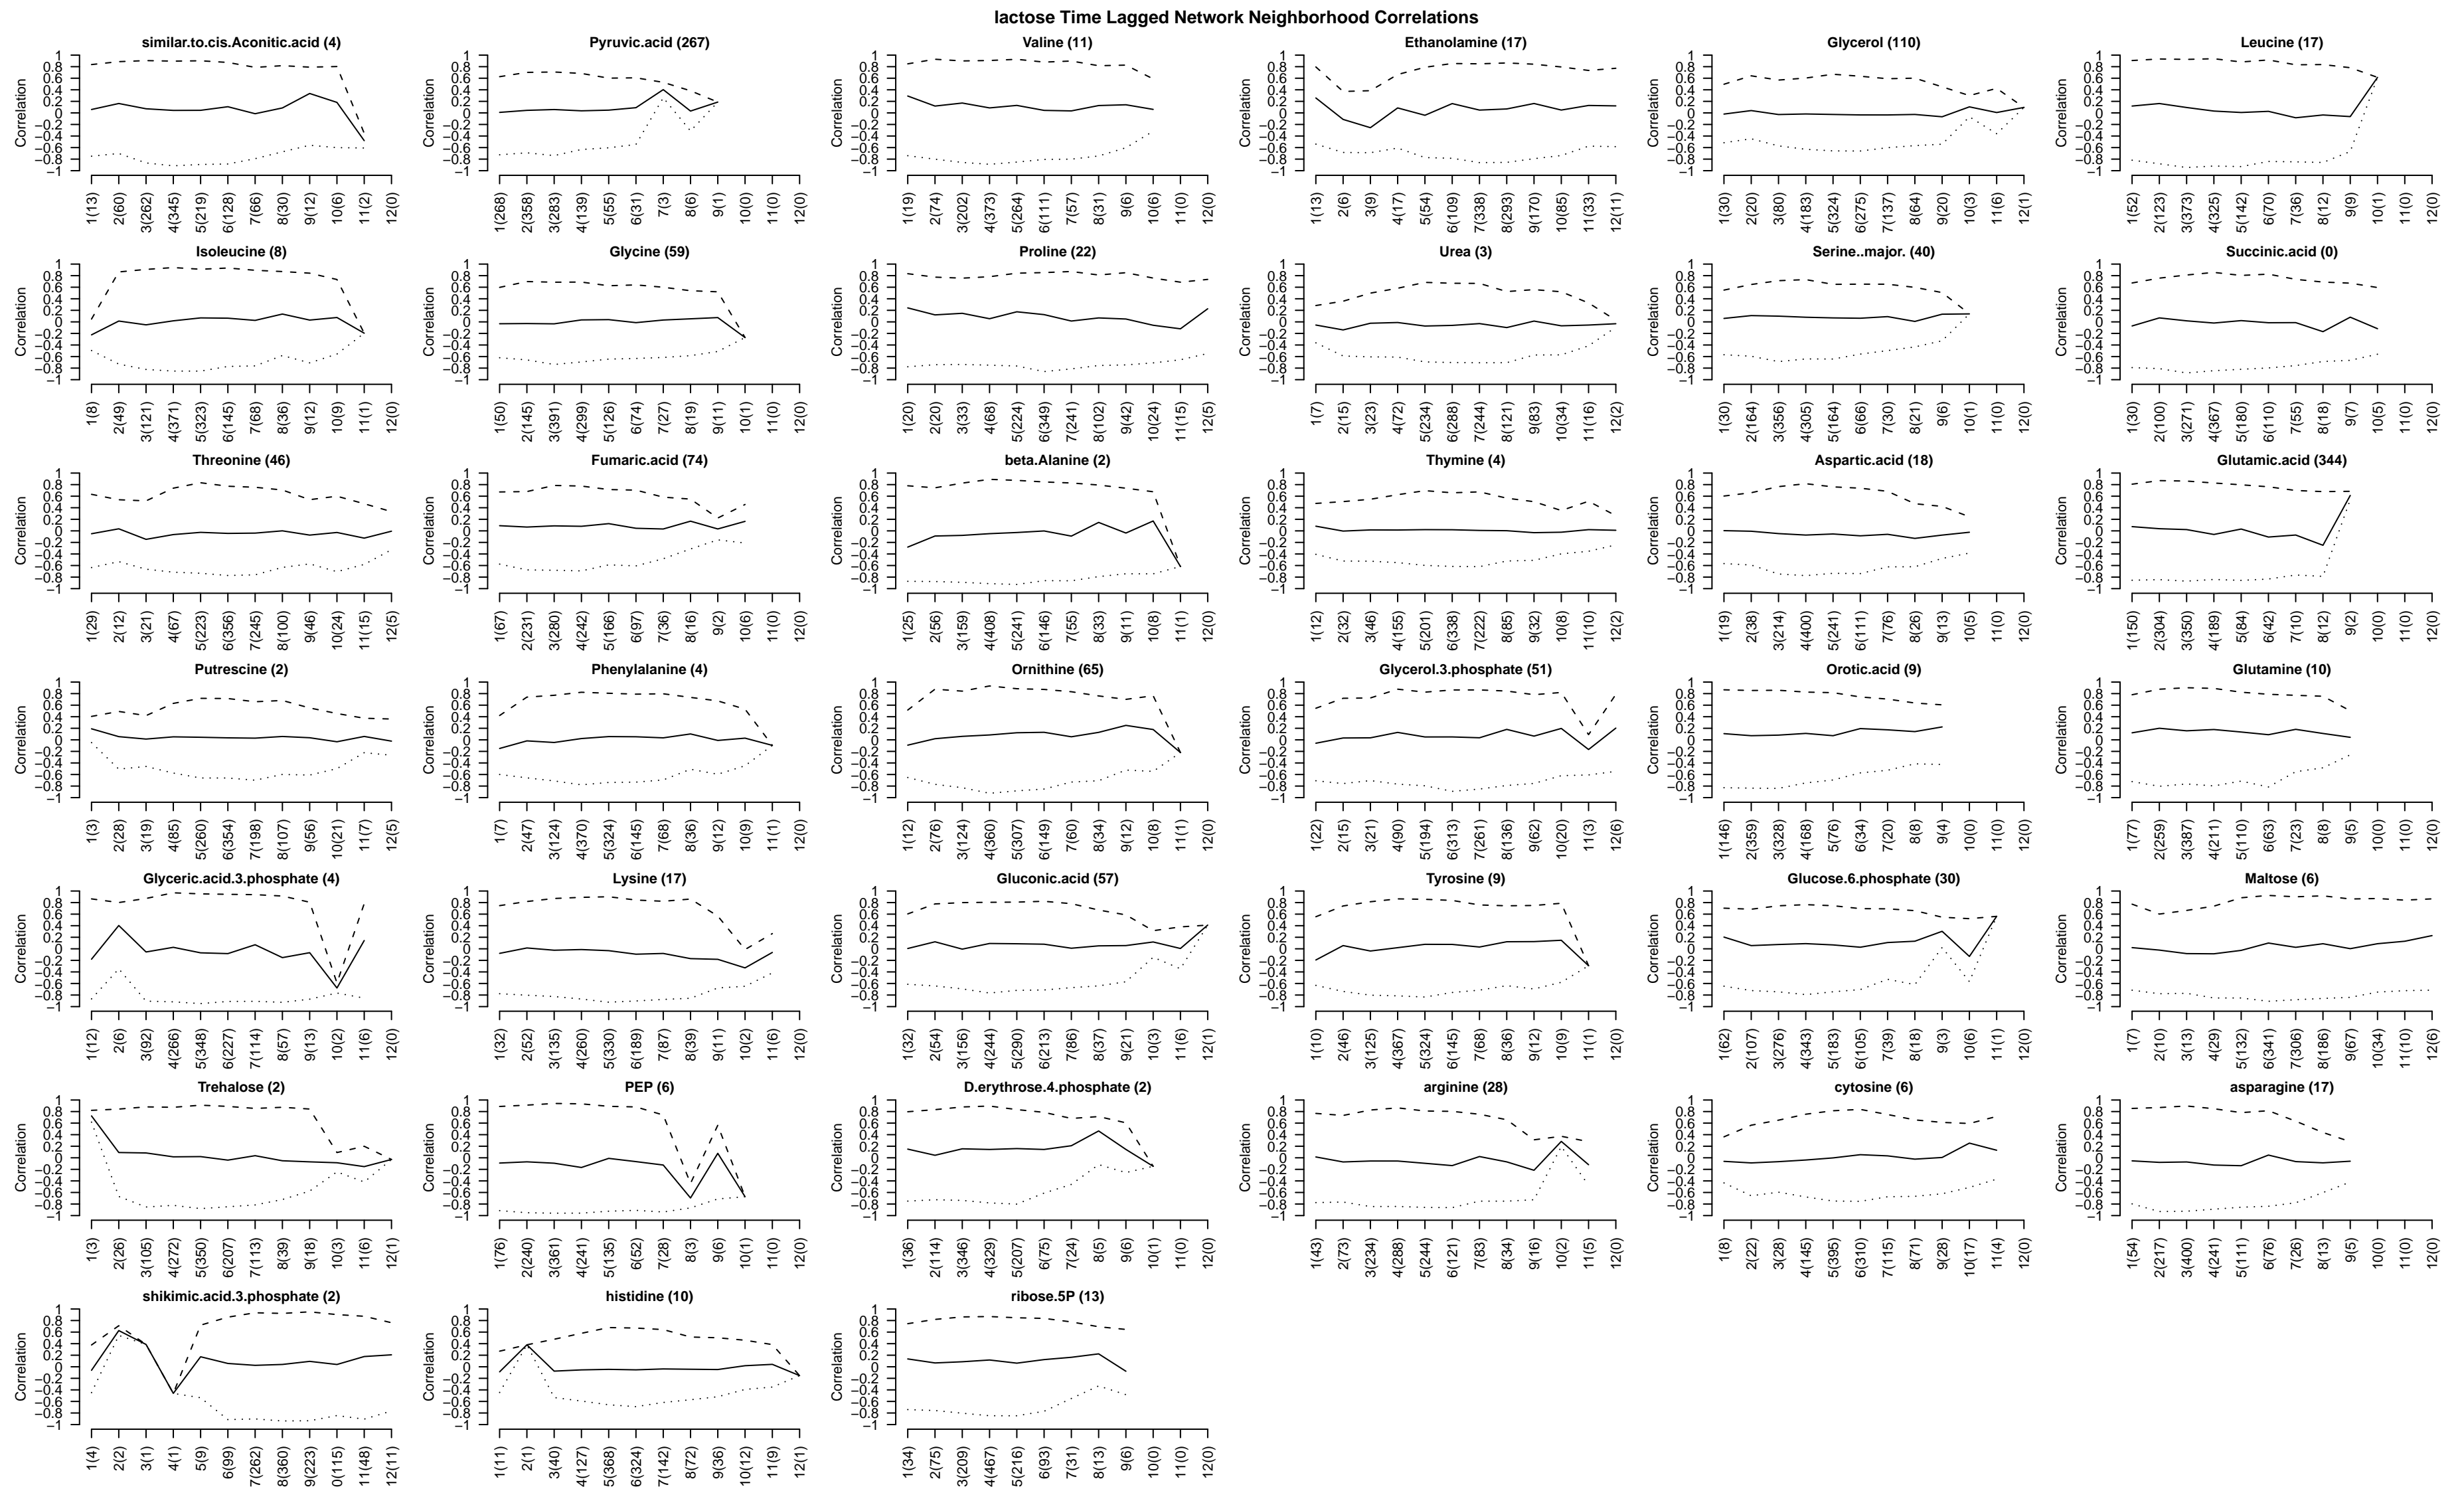

oxidativestress Time Lagged Network Neighborhood Correlations

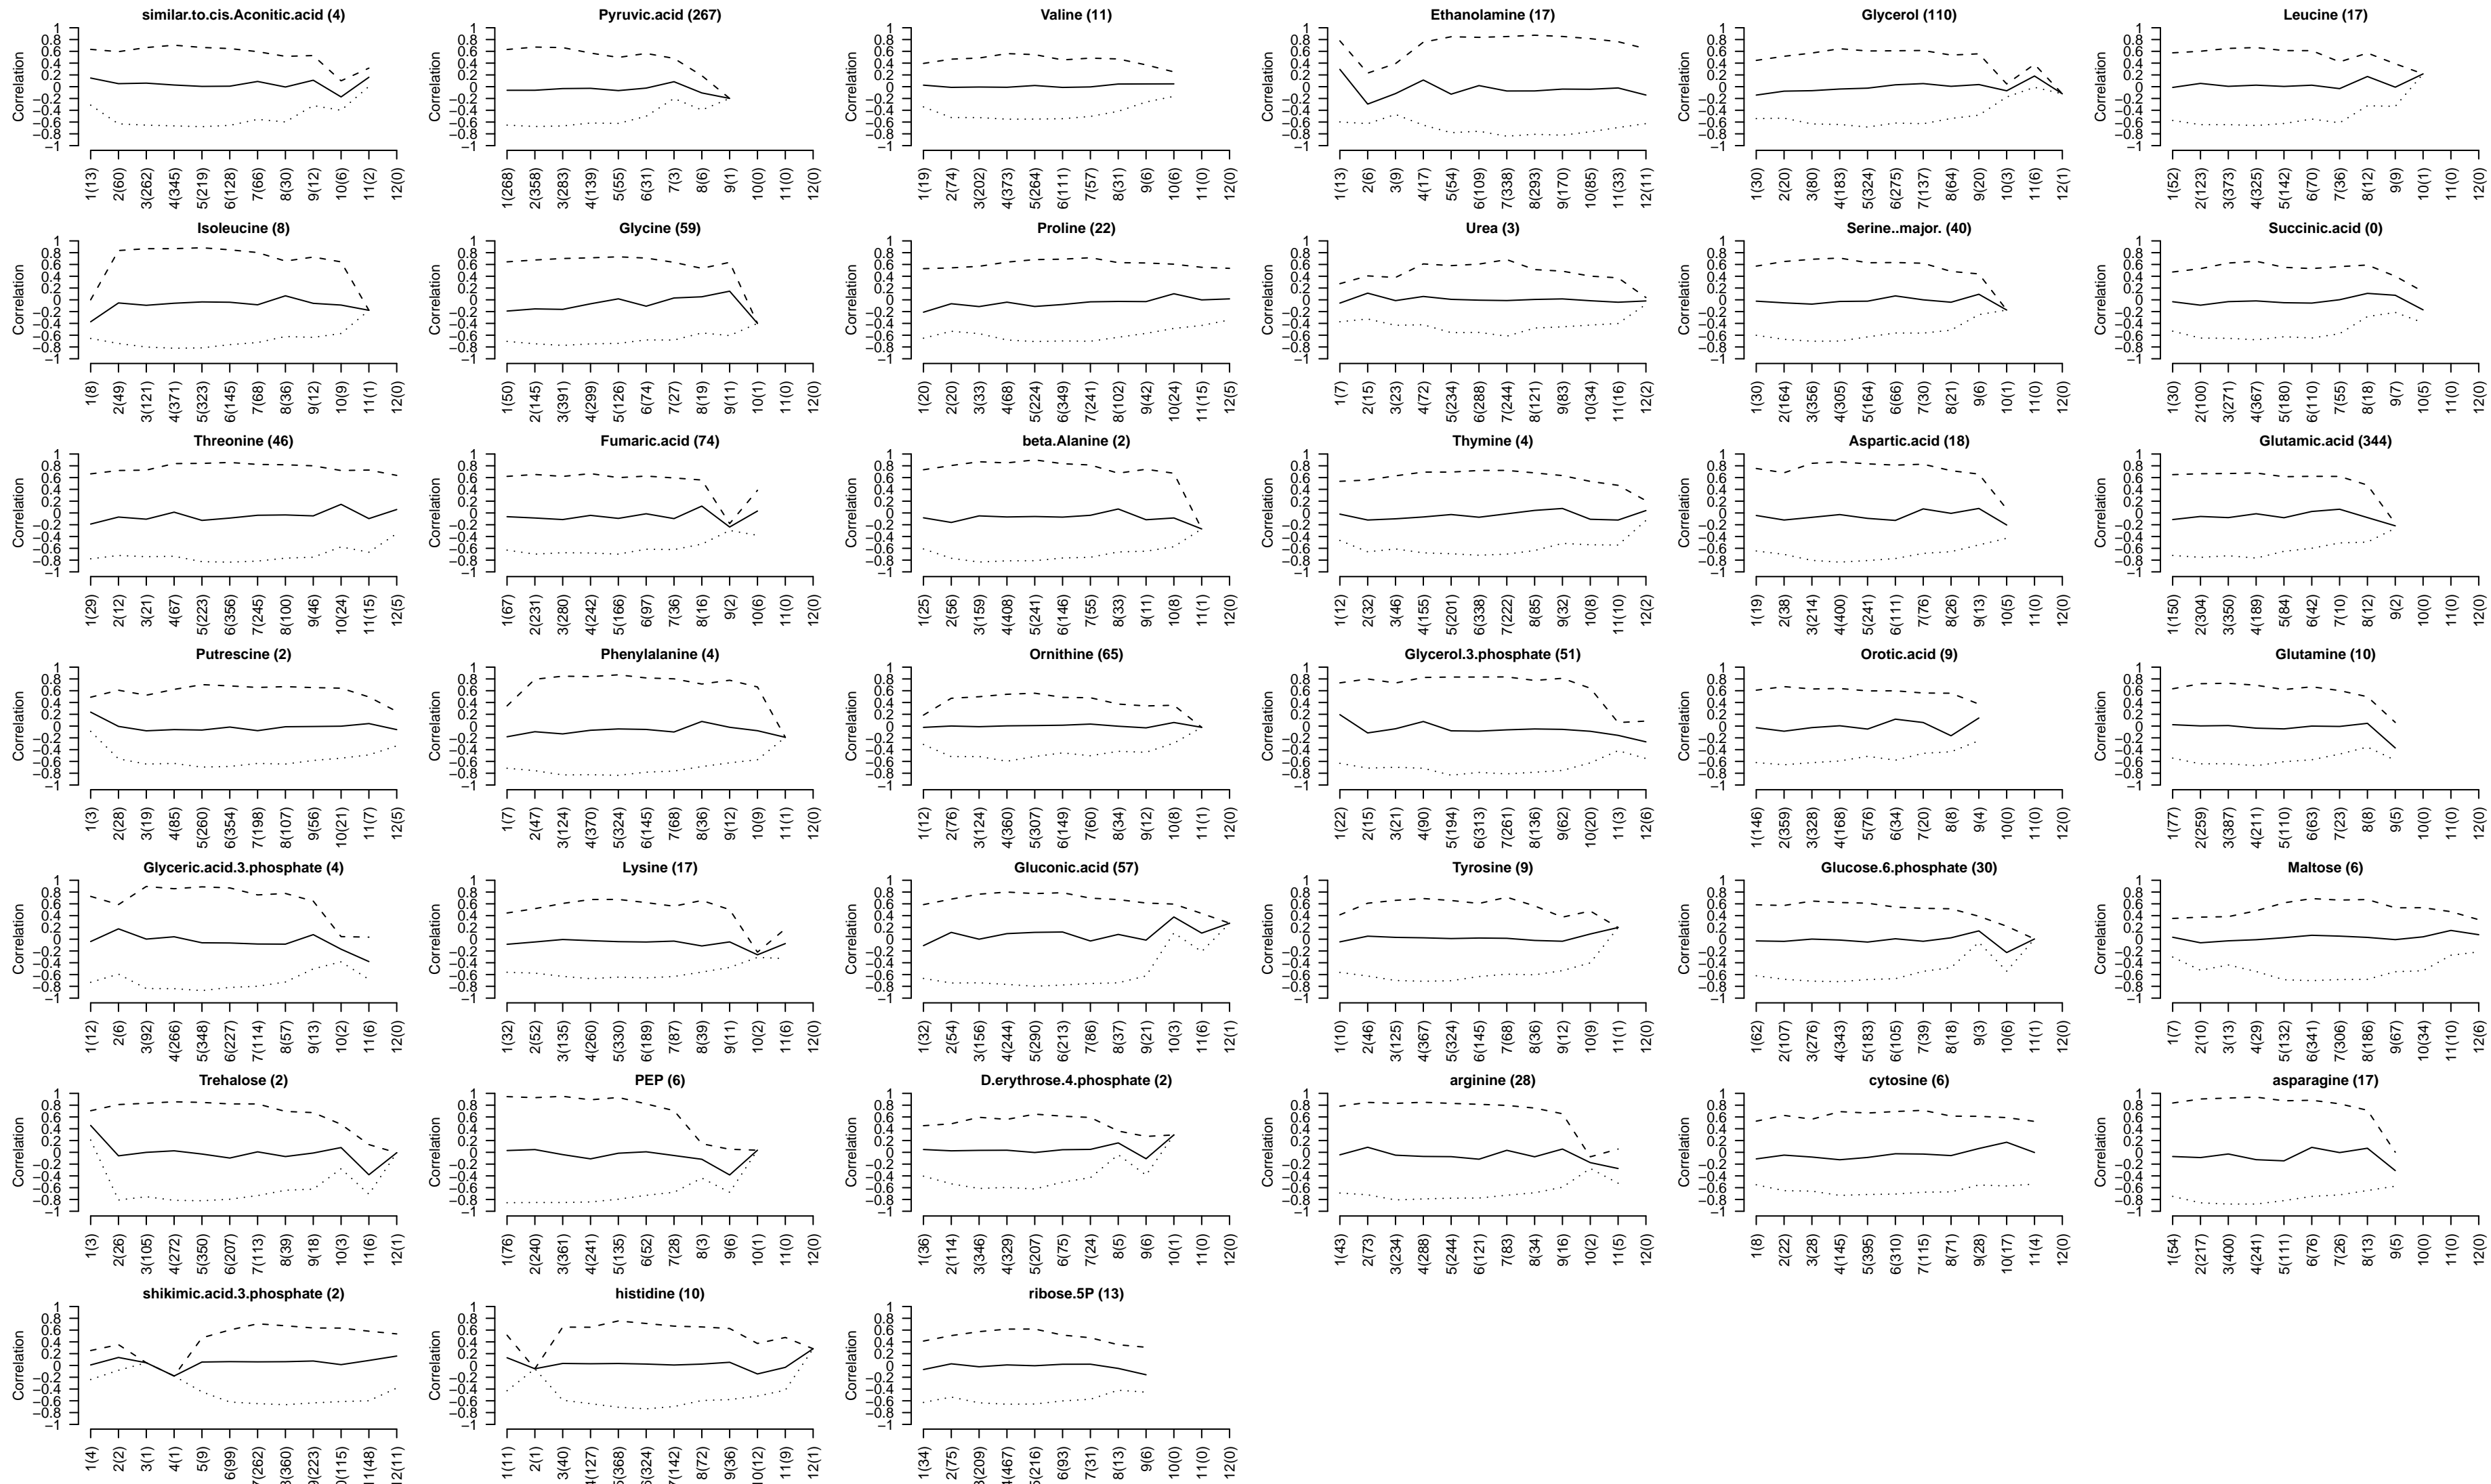

Supplement: pone.0031345.s001.pdf [file pone.0031345.s001.pdf]
